# Supplementary material for: Questionnaire results of user experiences with wearable exoskeletons and their preferences for sensory feedback
Source: J Neuroeng Rehabil. 2018 Nov 23;15:112. doi: 10.1186/s12984-018-0445-0 (PMC6260663; doi:10.1186/s12984-018-0445-0)
Supplement: Supplementary file 1 — Questionnaire. (ZIP 858 kb) [file 12984_2018_445_MOESM1_ESM.zip]

Archive with 2 entries (2 files):
- renamed_64d32.pdf
- Questionnaire English (translated).pdf
